# Supplementary material for: Ionic liquid-modified luffa sponge fibers for dispersive solid-phase extraction of benzoylurea insecticides from water and tea beverage samples
Source: Royal Society of Chemistry journal article supplement (doi:10.1039/c7nj04356b), 2018-01-01
Supplement: c7nj04356b1.pdf [file c7nj04356b1.pdf]

## Supplementary material

**Title:** Ionic liquid-modified luffa sponge fiber for dispersive solid-phase extraction of benzoylurea insecticides from water and tea beverage samples

**Names of authors:** Huazi Wang <sup>a</sup>, Chaoran Liu <sup>a</sup>, Xiaodong Huang <sup>a,b</sup>, Chendi Jia <sup>a</sup>, Yang Cao <sup>a</sup>,  
Lu Hu <sup>a</sup>, Runhua Lu <sup>a</sup>, Sanbing Zhang <sup>a</sup>, Haixiang Gao <sup>a</sup>, Wenfeng Zhou <sup>a,\*</sup>, Donghui Xu <sup>b,\*</sup>

**Institute:** <sup>a</sup> Department of Applied Chemistry, College of Science, China Agricultural University;

<sup>b</sup> Institute of Vegetables and Flowers, Chinese Academy of Agricultural Sciences, Laboratory of Quality & Safety Risk Assessment for Vegetable Products (Beijing), Ministry of Agriculture

**Institute address:** <sup>a</sup> Yuanmingyuan West Road 2#, Haidian District, Beijing 100193, China;

<sup>b</sup> NO.12 Zhongguancun South St., Haidian District, Beijing 100081, China

\* **Corresponding author:** Wenfeng Zhou, Donghui Xu

**Email:** zhouwenfeng@cau.edu.cn (W. Zhou); xudonghui@caas.cn (D. Xu)

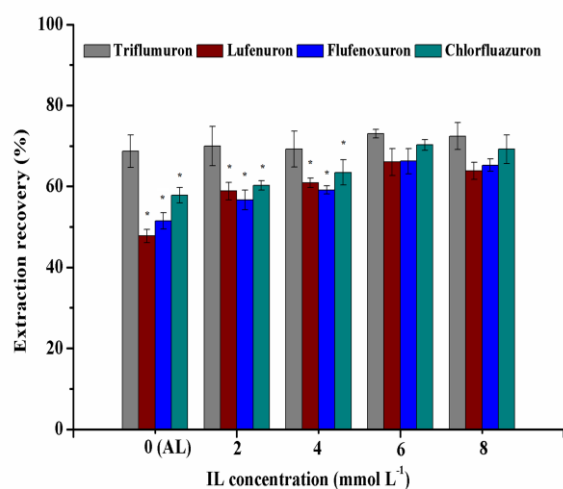

Fig. S1. Effect of the concentration of  $[C_{16}MIM]Br$  in the preparation of the sorbent. Extraction conditions: sorbent amount, 50 mg; vortex time, 6 min; salt addition, 10% (w/v); and sample volume, 8 mL. Desorption conditions: 300  $\mu L$  of methanol and ultrasound time, 15 min. Three replicate experiments were conducted. The asterisks indicate that the target recoveries are significantly different between 6  $mmol L^{-1}$  and the other concentrations ( $p < 0.05$ ).

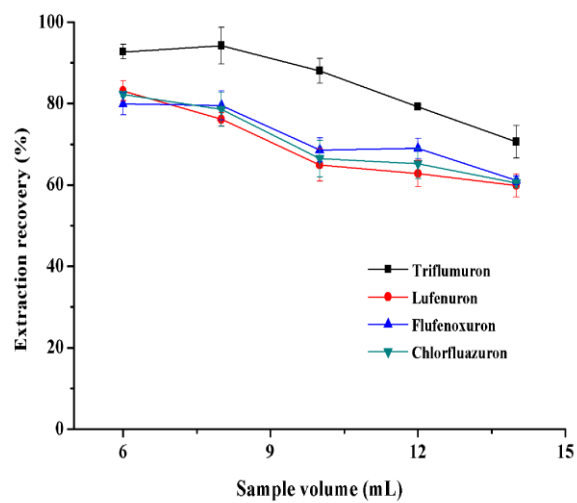

Fig. S2. Effect of the sample volume on the extraction of BUs. Extraction conditions: sorbent amount, 70 mg; salt addition, 10% (w/v); and vortex time, 6 min. Desorption conditions: 300  $\mu$ L of methanol and ultrasound time, 15 min. Three replicate experiments were conducted.

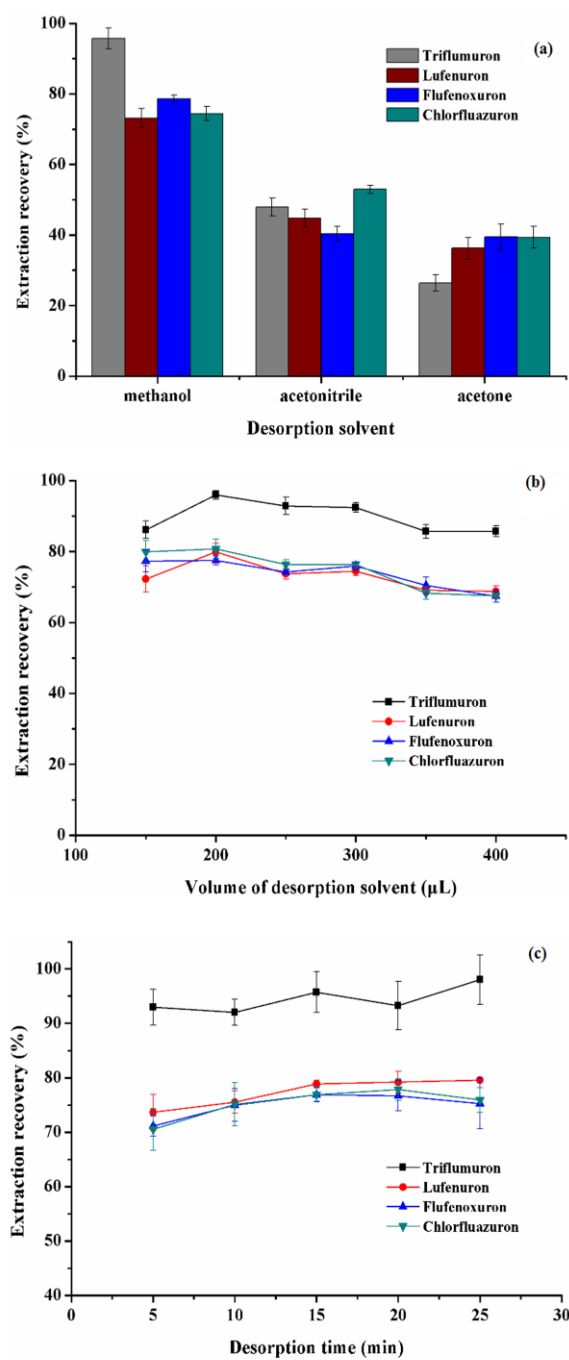

Fig. S3. Effect of the desorption conditions. Recoveries of BUs with different (a) types of desorption solvent, (b) volumes of desorption solvent, and (c) ultrasound times. Three replicate experiments were conducted.

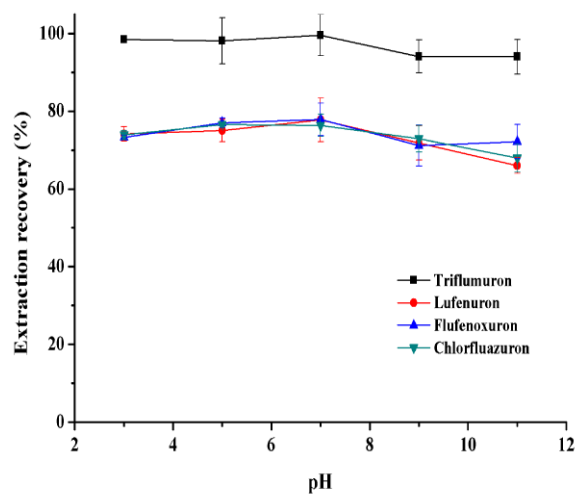

Fig. S4. Effect of the sample pH on the extraction of BUs. Extraction conditions: sorbent amount, 70 mg; salt addition, 5% (w/v); vortex time, 6 min; and sample volume, 8 mL. Desorption conditions: 200  $\mu$ L of methanol and ultrasound time, 15 min. Three replicate experiments were conducted.

Table S1 Results for the orthogonal experiments.

| Standard order | Factors                |                   |                       |                    |                                         | Average recovery (%) |
|----------------|------------------------|-------------------|-----------------------|--------------------|-----------------------------------------|----------------------|
|                | Amount of sorbent (mg) | Vortex time (min) | Salt addition (% w/v) | Sample volume (mL) | Volume of desorption solvent ( $\mu$ L) |                      |
| 1              | 40                     | 1                 | 0                     | 6                  | 200                                     | 31.7                 |
| 2              | 40                     | 2                 | 5                     | 8                  | 250                                     | 43.7                 |
| 3              | 40                     | 4                 | 10                    | 10                 | 300                                     | 43.3                 |
| 4              | 40                     | 6                 | 15                    | 12                 | 350                                     | 46.3                 |
| 5              | 40                     | 8                 | 20                    | 14                 | 400                                     | 39.7                 |
| 6              | 50                     | 1                 | 5                     | 10                 | 350                                     | 25.2                 |
| 7              | 50                     | 2                 | 10                    | 12                 | 400                                     | 35.9                 |
| 8              | 50                     | 4                 | 15                    | 14                 | 200                                     | 42.6                 |
| 9              | 50                     | 6                 | 20                    | 6                  | 250                                     | 62.6                 |
| 10             | 50                     | 8                 | 0                     | 8                  | 300                                     | 68.5                 |
| 11             | 60                     | 1                 | 10                    | 14                 | 250                                     | 30.1                 |
| 12             | 60                     | 2                 | 15                    | 6                  | 300                                     | 62.4                 |
| 13             | 60                     | 4                 | 20                    | 8                  | 350                                     | 55.6                 |
| 14             | 60                     | 6                 | 0                     | 10                 | 400                                     | 65.4                 |
| 15             | 60                     | 8                 | 5                     | 12                 | 200                                     | 83.1                 |
| 16             | 70                     | 1                 | 15                    | 8                  | 400                                     | 36.2                 |
| 17             | 70                     | 2                 | 20                    | 10                 | 200                                     | 46.2                 |
| 18             | 70                     | 4                 | 0                     | 12                 | 250                                     | 61.9                 |
| 19             | 70                     | 6                 | 5                     | 14                 | 300                                     | 79.8                 |
| 20             | 70                     | 8                 | 10                    | 6                  | 350                                     | 88.3                 |
| 21             | 80                     | 1                 | 20                    | 12                 | 300                                     | 36.8                 |
| 22             | 80                     | 2                 | 0                     | 14                 | 350                                     | 48.3                 |
| 23             | 80                     | 4                 | 5                     | 6                  | 400                                     | 87.0                 |
| 24             | 80                     | 6                 | 10                    | 8                  | 200                                     | 84.5                 |
| 25             | 80                     | 8                 | 15                    | 10                 | 250                                     | 67.6                 |
| $K_1$          | 40.9                   | 32.0              | 55.2                  | 66.4               | 57.6                                    |                      |
| $K_2$          | 47.0                   | 47.3              | 63.7                  | 57.7               | 53.2                                    |                      |
| $K_3$          | 59.3                   | 58.1              | 56.5                  | 49.5               | 58.2                                    |                      |
| $K_4$          | 62.5                   | 67.7              | 51.0                  | 52.8               | 52.7                                    |                      |
| $K_5$          | 64.8                   | 69.5              | 48.2                  | 48.1               | 52.8                                    |                      |
| $R$            | 23.9                   | 37.5              | 15.5                  | 18.3               | 5.4                                     |                      |

$K_i$ : average of the average recoveries of three repetitions for each level  $i=1, 2, 3, 4, 5$ ;  
 $R$ :  $K_{\max} - K_{\min}$ , larger  $R$  value indicating more significant effects.

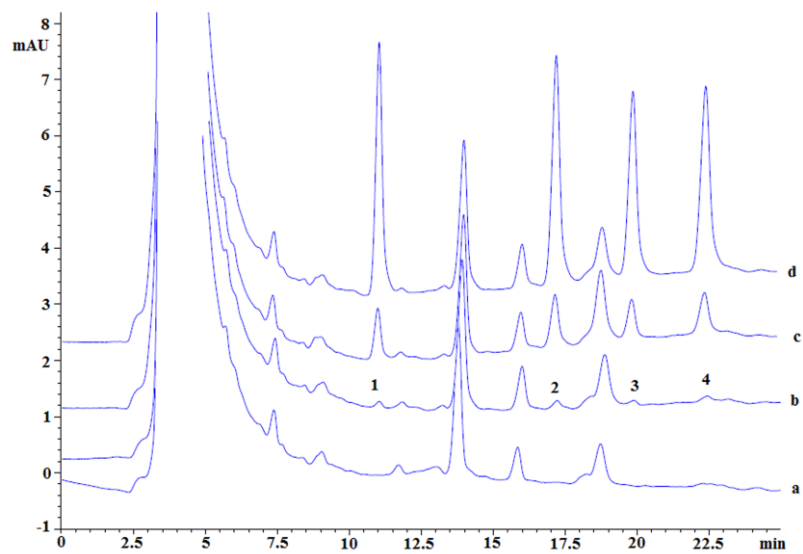

Fig. S5. The HPLC chromatograms of benzoylurea insecticides in the blank (a) and spiked (b, c and d, spiked with 2, 20 and 100 ng mL<sup>-1</sup>, respectively) green tea: 1. triflumuron; 2. lufenuron; 3. flufenoxuron; and 4. chlorfluazuron.
